# Supplementary material for: Cardiac Magnetic Resonance to Detect the Underlying Substrate in Patients with Frequent Idiopathic Ventricular Arrhythmias
Source: MDPI journal article supplement (doi:10.3390/diagnostics11061109), 2021-06-18
Supplement: s1 [file s1]

**Supplementary Table S1.** Baseline characteristics of the 72 patients included in the study.

| Supplementary Table 1. Baseline patient characteristics |               |
|---------------------------------------------------------|---------------|
| Clinical characteristics                                |               |
| Age (years)                                             | 47 ± 15       |
| Males, n (%)                                            | 34 (47.2)     |
| BSA (m <sup>2</sup> )                                   | 1.9 ± 0.2     |
| BMI (kg/m <sup>2</sup> )                                | 27.2 ± 4.9    |
| Smoking, n (%) <sup>*</sup>                             | 15 (24.2%)    |
| Clinical indication                                     |               |
| PVCs, n (%)                                             | 56 (77.8%)    |
| NSVT, n (%)                                             | 16 (22.2%)    |
| PVCs on 24-h Holter, (n)                                | 15936 ± 12894 |
| PVC/total QRS complexes, %                              | 14.7% ± 11.4% |
| Medical history                                         |               |
| Hypertension, n (%) <sup>†</sup>                        | 12 (17.4%)    |
| Dyslipidaemia, n (%) <sup>†</sup>                       | 25 (36.2%)    |
| Thyroid disease, n (%) <sup>†</sup>                     | 9 (13.0%)     |
| Diabetes                                                | 1.4%          |
| Antiarrhythmic therapy                                  |               |
| Beta-blockers, n (%) <sup>‡</sup>                       | 43 (63.2%)    |
| Calcium antagonists, n (%) <sup>‡</sup>                 | 1 (1.5%)      |
| Sodium channel blockers, n (%) <sup>‡</sup>             | 7 (10.3%)     |
| Amiodarone, n (%) <sup>‡</sup>                          | 3 (4.4%)      |
| None, n (%) <sup>‡</sup>                                | 14 (20.6%)    |

BMI: body mass index; BSA: body surface area; NSVT: non-sustained ventricular tachycardia; PVC: premature ventricular contraction. <sup>\*</sup>14% missingness; <sup>†</sup>4% missingness; <sup>‡</sup>5.6% missingness.

**Supplementary Table S2.** Cardiac Magnetic Resonance findings in patients and healthy control

subjects.

| <b>Table 2. CMR findings</b>      |                                 |                             |                       |
|-----------------------------------|---------------------------------|-----------------------------|-----------------------|
|                                   | <b>All patients<br/>(n= 72)</b> | <b>Controls<br/>(n= 72)</b> | <b><i>p</i> value</b> |
| LVEDV (ml)                        | 162.0 [138.3, 178.3]            | 147.5 [128.5, 173.5]        | <b>0.045</b>          |
| LVEDV index (ml/m <sup>2</sup> )  | 84.0 [75.4, 92.3]               | 79.0 [69.0, 87.3]           | <b>0.012</b>          |
| LVESV (ml)                        | 62.5 [52.3, 80.5]               | 51.5 [43.8, 61.3]           | <b>&lt;0.001</b>      |
| LVESV index (ml/m <sup>2</sup> )  | 33.7 [28.3, 41.8]               | 27.0 [24.3, 31.5]           | <b>&lt;0.001</b>      |
| LVSV (ml)                         | 93.5 [80.5, 106.0]              | 95.0 [83.8, 109.0]          | 0.378                 |
| LVSV index (ml/m <sup>2</sup> )   | 48.7 [44.2, 54.4]               | 50.9 [45.3, 56.8]           | 0.178                 |
| LV ejection fraction (%)          | 59.5 [56.0, 64.0]               | 65.0 [63.0, 67.0]           | <b>&lt;0.001</b>      |
| LV mass (g)                       | 101.5 [80.8, 117.0]             | 103.0 [87.8, 120.8]         | 0.298                 |
| LV mass index (g/m <sup>2</sup> ) | 52.7 (9.7)                      | 55.5 (9.4)                  | 0.075                 |
| RVEDV (ml)                        | 149.0 [122.5, 171.5]            | 144.5 [122.0, 172.3]        | 0.971                 |
| RVEDV index (ml/m <sup>2</sup> )  | 76.9 [68.4, 86.0]               | 77.6 [67.0, 85.2]           | 0.837                 |
| RVESV (ml)                        | 55.0 [43.5, 67.0]               | 49.5 [38.8, 59.3]           | 0.07                  |
| RVESV index (ml/m <sup>2</sup> )  | 28.5 [23.7, 34.5]               | 25.6 [21.9, 30.0]           | 0.053                 |
| RVSV (ml)                         | 93.0 [78.0, 103.0]              | 93.5 [85.8, 111.8]          | 0.159                 |
| RVSV index (ml/m <sup>2</sup> )   | 28.5 [23.7, 34.5]               | 25.6 [21.9, 30.0]           | 0.053                 |
| RV ejection fraction (%)          | 62.6 ± 6.0                      | 66.1 ± 4.3                  | <b>&lt;0.001</b>      |

EDV: end-diastolic volume; ESV: end-systolic volume; LV: left ventricular; RV: right ventricular; SV: stroke volume. Values with normal distribution are shown as mean ± standard deviation, while values without normal distribution are shown as median with interquartile range.

**Supplementary Table S3.** Procainamide dose and effect on haemodynamic parameters and arrhythmia burden.

| Procainamide Administration                                    | Before              | After           | <i>p</i> -Value |
|----------------------------------------------------------------|---------------------|-----------------|-----------------|
| Mean procainamide dose (mg): $536 \pm 200$                     | -                   | -               | -               |
| Range (mg): 200 - 1000                                         |                     |                 |                 |
| Systolic blood pressure (mmHg)                                 | $131 \pm 19$        | $119 \pm 18$    | <0.001          |
| Diastolic blood pressure (mmHg)                                | $68 \pm 15$         | $65 \pm 13$     | 0.132           |
| Heart rate (bpm)                                               | $76 \pm 12$         | $75 \pm 14$     | 0.483           |
| Image Quality<br>(1 bad, 2 moderate, 3 very good, 4 excellent) | $1.52 \pm 0.51$     | $3.48 \pm 0.63$ | <0.001          |
| Result                                                         | No. of patients (%) |                 |                 |
| Complete PVCs suppression                                      | 10 (34.5%)          |                 |                 |
| Significant PVCs reduction                                     | 18 (62.1%)          |                 |                 |
| No response                                                    | 1 (3.4%)            |                 |                 |

The average dose of procainamide administered i.v. on the scanner table prior to Cardiac Magnetic Resonance scanning was  $536 \pm 200$  mg (range 200-1000 mg) with an average duration of administration of  $11 \pm 4$  minutes. There was a small but statistically significant drop in systolic blood pressure after procainamide administration, but no significant drop in diastolic blood pressure or heart rate. An operator graded image quality on cine images before and after procainamide administration. A 1 to 4 scale system was used: 4 – no artefacts - excellent image quality; 3 – minor artefacts with overall good image quality; 2 – moderate artefacts affecting significantly image quality and the accuracy of the analysis; and 1 – major artefacts, scan not analysable at all. Overall image quality significantly improved after procainamide administration. Paired t-tests were used to compare blood pressure and heart rate response of the patients, and image quality before and after procainamide administration. All tests were two-sided and  $\alpha$  was set at 0.05. PVCs: premature ventricular contractions.

**Supplementary Table S4.** Possible origin of ventricular arrhythmia based on ECG findings.

| Supplementary Table 4. Characteristics of ventricular arrhythmia |                         |
|------------------------------------------------------------------|-------------------------|
| Origin of ventricular arrhythmia                                 | Number of patients* (%) |
| RV outflow tract                                                 | 40 (61.5%)              |
| LV outflow tract / coronary sinus                                | 5 (7.7%)                |
| Mitral annulus / aortomitral continuity                          | 4 (6.2%)                |
| LV origin                                                        | 11 (16.9%)              |
| RV origin                                                        | 2 (3.1%)                |
| Two morphologies                                                 | 3 (4.6%)                |

LV: left ventricular; RV: right ventricular. \*9.7% missingness
